# Supplementary material
Source: MDPI journal article supplement (https://www.mdpi.com/2073-4441/14/17/2673)
Supplement: s1 [file s1]

# Supplementary Materials

**Table S1.** Parameters of pore structure of AA and MAA.

**Table S2.** Kinetic models of MAA on fluoride removal.

**Table S3.** Thermodynamic parameters on MAA.

**Figure S1.** The diagram of impregnation equipment.

**Table S1.** Parameters of pore structure of AA and MAA.

| Sample | $S_{BET}$ (m <sup>2</sup> /g) | $V_{TOTAL}$ (cc <sup>2</sup> /g) | Pore Diameter (nm) |
|--------|-------------------------------|----------------------------------|--------------------|
| AA     | 287.259                       | 6.310                            | 0.434              |
| MAA    | 295.599                       | 5.821                            | 0.377              |

**Table S2.** Kinetic models of MAA on fluoride removal.

| Kinetic Models           | Parameters       | Initial Fluoride Concentration |         |         |
|--------------------------|------------------|--------------------------------|---------|---------|
|                          |                  | 3mg/L                          | 6mg/L   | 12mg/L  |
| Quasi-first-order model  | R <sup>2</sup>   | 0.9803                         | 0.9974  | 0.9992  |
|                          | $Q_e$ (mg/g)     | 0.31                           | 0.56    | 1.01    |
|                          | $K_1$ (1/min)    | 0.0087                         | 0.0073  | 0.0055  |
| Quasi-second-order model | R <sup>2</sup>   | 0.9993                         | 0.9994  | 0.9998  |
|                          | $Q_e$ (mg/g)     | 0.33                           | 0.64    | 1.33    |
|                          | $K_2$ (g/mg·min) | 0.0414                         | 0.0173  | 0.0073  |
| Film diffusion model     | R <sup>2</sup>   | 0.9620                         | 0.9655  | 0.9757  |
|                          | $K_3$ (1/min)    | 0.00115                        | 0.00133 | 0.00134 |
| Boyd model               | $A$              | 7.25988                        | 7.41156 | 7.55434 |
|                          | R <sup>2</sup>   | 0.9877                         | 0.9767  | 0.9756  |
| Langmuir kinetics model  | R <sup>2</sup>   | 0.9623                         | 0.9809  | 0.9918  |

**Table S3.** Thermodynamic parameters on MAA.

| C0<br>/(mg·L <sup>-1</sup> ) | $\Delta H$<br>/(J·mol <sup>-1</sup> ) | $\Delta G$ /(kJ·mol <sup>-1</sup> ) |           |           | $\Delta S$ /(J·(mol·K) <sup>-1</sup> ) |      |       |
|------------------------------|---------------------------------------|-------------------------------------|-----------|-----------|----------------------------------------|------|-------|
|                              |                                       | 298                                 | 308       | 318       | 298                                    | 308  | 318   |
| 5                            | 20485.7                               | -23103.4                            | -23,878.6 | -24,653.9 | 146.3                                  | 80.2 | 120.4 |
| 7                            | 19989.4                               | -21892.6                            | -22,627.2 | -23,361.9 | 140.5                                  | 76.0 | 101.5 |
| 10                           | 17416.2                               | -17698.8                            | -18,292.7 | -18,886.6 | 117.8                                  | 61.4 | 67.6  |
| 15                           | 13902.7                               | -11928.3                            | -12,328.5 | -12,728.8 | 86.7                                   | 41.4 | 43.1  |
| 20                           | 11920.6                               | -7672.78                            | -7930.3   | -8187.7   | 65.8                                   | 26.6 | 27.6  |

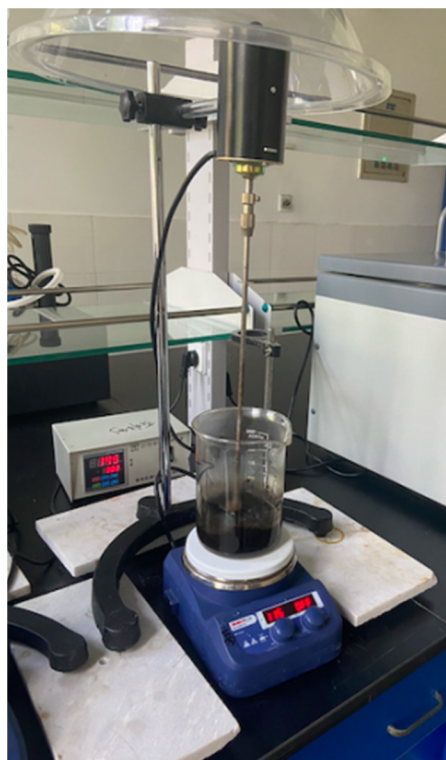

**Figure S1.** The diagram of impregnation equipment.
